# Supplementary material for: The Identification of APOBEC3G as a Potential Prognostic Biomarker in Acute Myeloid Leukemia and a Possible Drug Target for Crotonoside
Source: MDPI journal article supplement (doi:10.3390/molecules27185804), 2022-09-07
Supplement: s1 [file s1]

**Table S1.** 2017 European LeukemiaNet cytogenetic risk stratification of acute myeloid leukemia.

| Risk category*      | Genetic abnormality                                                                                              |
|---------------------|------------------------------------------------------------------------------------------------------------------|
| <b>Favorable</b>    | t(8;21)(q22;q22.1); <i>RUNX1-RUNX1T1</i>                                                                         |
|                     | inv(16)(p13.1;q22) or t(16;16)(p13.1;q22); <i>CBFB-MYH11</i>                                                     |
|                     | Mutated <i>NPM1</i> without <i>FLT3-ITD</i> or with <i>FLT3-ITD low</i>                                          |
|                     | Biallelic mutated <i>CEBPA</i>                                                                                   |
| <b>Intermediate</b> | Mutated <i>NPM1</i> and <i>FLT3-ITD high</i>                                                                     |
|                     | Wild type <i>NPM1</i> without <i>FLT3-ITD</i> or with <i>FLT3-ITD low</i> (without adverse-risk genetic lesions) |
|                     | t(9;11)(p21.3;q23.3); <i>MLLT3-KMT2A</i>                                                                         |
|                     | Cytogenetic abnormalities not classified as favorable or adverse                                                 |
| <b>Poor</b>         | t(6;9)(p23;q34.1); <i>DEK-NUP214</i>                                                                             |
|                     | t(v;11q23.3); <i>KMT2A</i> rearranged                                                                            |
|                     | t(9;22)(q34.1;q11.2); <i>BCR-ABL1</i>                                                                            |
|                     | inv(3)(q21.3q26.2) or t(3;3)(q21.3;q26.2); <i>GATA2,MECOM(EV11)</i> –5 or del(5q); –7; –17/abn(17p)              |
|                     | Complex karyotype, monosomal karyotype                                                                           |
|                     | Wild type <i>NPM1</i> and <i>FLT3-ITD high</i>                                                                   |
|                     | Mutated <i>RUNX1</i>                                                                                             |
|                     | Mutated <i>ASXL1</i>                                                                                             |
|                     | Mutated <i>TP53</i>                                                                                              |
